# Supplementary material for: Acute Kidney Injury in Critically Ill Children and Subsequent Chronic Kidney Disease
Source: PubMed Central journal article supplement — Can J Kidney Health Dis. 2019 Oct 14;6:2054358119880188. doi: 10.1177/2054358119880188 (PMC6794652; doi:10.1177/2054358119880188), 2019-10-14
Supplement: CKD_Supplemental_Material_Revisions_1_07_Aug_2019.pdf [file CKD_Supplemental_Material_Revisions_1_07_Aug_2019.pdf]

## Supplementary Material

### AKI in Critically Ill Children and Subsequent CKD

Erin Hessey, MSc, Sylvie Perreault, BPharm, PhD, Marc Dorais, MSc, Louise Roy, MD, Michael Zappitelli, MD, MSc

**Supplemental Table 1:** Non-exhaustive list of pediatric intensive care unit and hospitalization variables collected pertinent to this study and source of data.

| Variable collected                      | Source of variable                                                                                                                    |
|-----------------------------------------|---------------------------------------------------------------------------------------------------------------------------------------|
| <b>Baseline Patient Characteristics</b> |                                                                                                                                       |
| Date of birth                           | Chart, RAMQ                                                                                                                           |
| Gender                                  | Chart, RAMQ                                                                                                                           |
| Center                                  | Chart                                                                                                                                 |
| Hospital admission/discharge dates      | Chart                                                                                                                                 |
| PICU admission/discharge dates          | Chart                                                                                                                                 |
| Primary PICU diagnosis                  | Chart<br>Each patient could only be classified in one category                                                                        |
| PRISM score/PRISM Death Rate            | Chart<br>Collected values from the first 24-hours of PICU admission and calculated using published equations                          |
| Pediatric Medical Complexity Algorithm  | RAMQ<br>Algorithm includes ICD-9 codes to categorize patient. Used all diagnostic codes from index admission to classify the patient. |
| <b>PICU treatment characteristics</b>   |                                                                                                                                       |
| Nephrotoxic antibiotics                 | Chart<br>Collected for every day of PICU admission (up to 21 days)                                                                    |
| Vasopressors used                       | Chart<br>Collected for every day of PICU admission (up to 21 days)                                                                    |
| Steroids used                           | Chart<br>Collected for every day of PICU admission (up to 21 days)                                                                    |
| Mechanically ventilated (yes/no)        | Chart<br>Collected for every day of PICU admission (up to 21 days)                                                                    |
| <b>Renal Specific</b>                   |                                                                                                                                       |
| Serum creatinine                        | Chart<br>Collected for every day of PICU admission (up to 21 days)                                                                    |
| Urine output                            | Chart<br>Collected for every day of PICU admission (up to 21 days) in 8 hour intervals                                                |
| Dialysis (yes/no)                       | Chart<br>Collected for every day of PICU admission (up to 21 days)                                                                    |

Abbreviations: *RAMQ*: Régie de l'assurance maladie du Québec (provincial health care body); *PICU*: Pediatric Intensive Care Unit; *PRISM*: Pediatric Risk of Mortality score

**Supplemental Table 2:** Broader and stricter CKD diagnostic code definitions tested to generate the algorithm.

| <b>Broader Definition</b>                         |                                   |                                                                                                                                                        |
|---------------------------------------------------|-----------------------------------|--------------------------------------------------------------------------------------------------------------------------------------------------------|
| <b>Description</b>                                | <b>ICD-9</b>                      | <b>ICD-10</b>                                                                                                                                          |
| CKD                                               | 585                               | N18.x                                                                                                                                                  |
| Unspecified renal failure                         | 586                               | N19                                                                                                                                                    |
| Hypertensive renal disease                        | 403.9, 404.9                      | N12, I13                                                                                                                                               |
| Chronic glomerulonephritis                        | 582.8, 582.1, 582.0, 582.2, 582.9 | N03.x                                                                                                                                                  |
| Miscellaneous other renal disease                 | 581.8, 583.8                      | N08.3, N08.4, N08.5, N08.2, N08.8                                                                                                                      |
| Diabetic nephropathy                              | 250.3                             | E102.0, E102.1, E102.2, E102.8, E112.0, E112.1, E112.2, E112.3, E112.8, E132.0, E132.1, E132.2, E132.3, E132.8, E142.0, E142.1, E142.2, E142.3, E142.8 |
| Proteinuria                                       | 791.0                             | R80                                                                                                                                                    |
| Outpatient dialysis related                       | V451                              | Z992                                                                                                                                                   |
| <b>Stricter Definition</b>                        |                                   |                                                                                                                                                        |
| <b>Description</b>                                | <b>ICD-9</b>                      | <b>ICD-10</b>                                                                                                                                          |
| CKD                                               | 585                               | N18.x                                                                                                                                                  |
| Unspecified renal failure                         | 586                               | N19                                                                                                                                                    |
| Proteinuria                                       | 791.0                             | R80                                                                                                                                                    |
| Dialysis if present during a non-admission period | V451                              | Z992                                                                                                                                                   |

Abbreviations: *CKD* = chronic kidney disease; *ICD-9/10* = International Classification of Disease codes 9<sup>th</sup> and 10<sup>th</sup> edition

**Supplemental Table 3:** Full description of final codes used from administrative health data for the pediatric CKD algorithm.

| <b>DIAGNOSTIC CODES (ICD-9/ICD-10)</b>                                                                                                                                              |                                |                                                  |                        |               |
|-------------------------------------------------------------------------------------------------------------------------------------------------------------------------------------|--------------------------------|--------------------------------------------------|------------------------|---------------|
| <b>Description</b>                                                                                                                                                                  | <b>Inpatient or Outpatient</b> |                                                  | <b>Outpatient only</b> |               |
|                                                                                                                                                                                     | <b>ICD-9</b>                   | <b>ICD-10</b>                                    | <b>ICD-9</b>           | <b>ICD-10</b> |
| CKD                                                                                                                                                                                 | 585                            | N18.x                                            |                        |               |
| Unspecified renal failure                                                                                                                                                           | 586                            | N19                                              |                        |               |
| Proteinuria                                                                                                                                                                         | 791.0                          | R80                                              |                        |               |
| Kidney Transplant Status                                                                                                                                                            | V42.0                          | Z94.0                                            |                        |               |
| Kidney Transplant rejection                                                                                                                                                         | 996.8                          | T86.100                                          |                        |               |
| Kidney transplant failure                                                                                                                                                           | 996.8                          | T86.101                                          |                        |               |
| Renal tubulo-interstitial disorders in transplant rejection                                                                                                                         | 590.8                          | N16.5                                            |                        |               |
| Outpatient Dialysis                                                                                                                                                                 |                                |                                                  | V45.1                  | Z99.2         |
| Care involving dialysis                                                                                                                                                             |                                |                                                  |                        |               |
| Preparatory care for dialysis                                                                                                                                                       |                                |                                                  | V53.9                  | Z49.0         |
| Extracorporeal dialysis                                                                                                                                                             |                                |                                                  | V56.0                  | Z49.1         |
| Other dialysis (includes peritoneal dialysis)                                                                                                                                       |                                |                                                  | V56.8                  | Z49.2         |
| Mechanical complication of vascular dialysis catheter                                                                                                                               |                                |                                                  | 996.1                  | T82.4         |
| Unintentional cut, puncture, perforation or hemorrhage during surgical and medical care – during kidney dialysis or other perfusion                                                 |                                |                                                  | E87.02                 | Y60.2         |
| Foreign object accidentally left in body during surgical and medical care - during kidney dialysis or other perfusion                                                               |                                |                                                  | E87.12                 | Y61.2         |
| Failure of sterile precautions during surgical and medical care - during kidney dialysis or other perfusion                                                                         |                                |                                                  | E87.22                 | Y62.2         |
| Other medical procedures as the cause of abnormal reaction of the patient, or of later complication, without mention of misadventure at the time of the procedure – Kidney dialysis |                                |                                                  | E87.91                 | Y84.1         |
| <b>PROCEDURAL CODES (CCA/CCI)</b>                                                                                                                                                   |                                |                                                  |                        |               |
| <b>Description</b>                                                                                                                                                                  | <b>Inpatient or Outpatient</b> |                                                  | <b>Outpatient only</b> |               |
|                                                                                                                                                                                     | <b>CCA</b>                     | <b>CCI</b>                                       | <b>CCA</b>             | <b>CCI</b>    |
| Bypass, artery with vein (creation of hemodialysis fistula)                                                                                                                         | 5127                           | 1KY76LA<br>1KY76LASJ<br>1KY76LAXXA<br>1KY76LAXXL |                        |               |

|                                                                                                          |                                                                     | 1KY76LAXXN                                           |      |                                     |
|----------------------------------------------------------------------------------------------------------|---------------------------------------------------------------------|------------------------------------------------------|------|-------------------------------------|
| Repair artery with vein (repair of hemodialysis fistula)                                                 | 5142                                                                | 1KY80LA<br>1KY80LAXXA<br>1KY80LAXXK<br>1KY80LAXXN    |      |                                     |
| Bypass terminating in lower limb vein [e.g. femoral artery to saphenous vein for long term hemodialysis] | 5129                                                                | 1KG76MZXXA<br>1KG76MZXXN                             |      |                                     |
| Removal of permanent catheter (peritoneal dialysis)                                                      | 660                                                                 | 1SY55LAFT                                            |      |                                     |
| Transfer Kidney (autotransplantation)                                                                    | 6751                                                                | 1PC83LA                                              |      |                                     |
| Transplant, Kidney                                                                                       | 6759                                                                | 1PC85LAXXJ<br>1PC85LAXXK                             |      |                                     |
| Multi organ: pancreas with duodenum and kidney                                                           | 6483                                                                | 1OK85TNXXX<br>1OK85XTXXX<br>1OK85XUXXX<br>1OK85XVXXX |      |                                     |
| Peritoneal Dialysis                                                                                      |                                                                     |                                                      | 6698 | 1PZ21HPD4                           |
| Hemodialysis                                                                                             |                                                                     |                                                      | 5195 | 1PZ21HQBR                           |
| Instructions for dialysis (dialysis training)                                                            |                                                                     |                                                      | 0789 | 7SC59QD                             |
| Implantation of catheter (peritoneal dialysis)                                                           |                                                                     |                                                      | 6693 | 1OT53DATS<br>1OT53HATS<br>1OT53LATS |
| MEDICATION CODES                                                                                         |                                                                     |                                                      |      |                                     |
| Category                                                                                                 | Drug name                                                           | Code                                                 |      |                                     |
| Erythropoietin                                                                                           | Epoetin alfa<br>Darbepoetine alfa                                   | 46635, 47191<br>46828, 47441                         |      |                                     |
| Activated Vitamin D                                                                                      | Calcitriol<br>Alfacalcidol                                          | 40589<br>41642                                       |      |                                     |
| Potassium –removing agents                                                                               | Polystyrene sodium sulfonate<br>Calcium polystyrene sulphonate      | 07787<br>44931                                       |      |                                     |
| Phosphate binding agents                                                                                 | Lanthanum hydrate<br>Sevelamer carbonate<br>Sevelamer hydrochloride | 47667<br>47859<br>46671, 47400                       |      |                                     |

Abbreviations: *CKD* = chronic kidney disease; *ICD-9/10* = International Classification of Disease codes 9<sup>th</sup> and 10<sup>th</sup> edition; *CCP* = Canadian Classification of Diagnostic, Therapeutic and Surgical Procedure; *CCI* = Canadian Classification of Health Interventions

**Supplemental Table 4:** Association of baseline and ICU characteristics with CKD stratified by AKI (yes/no)

| Variables                                       | No AKI             |               | AKI               |               |
|-------------------------------------------------|--------------------|---------------|-------------------|---------------|
|                                                 | No CKD<br>(N=1748) | CKD<br>(N=23) | No CKD<br>(N=444) | CKD<br>(N=20) |
| <b>Patient Characteristics</b>                  |                    |               |                   |               |
| ICU admission age, years                        | 3.7 (10.3)         | 4.7 (12.8)    | 3.5 (10.6)        | 5.0 (10.0)    |
| Female Gender                                   | 765 (44%)          | 17 (74%)*     | 201 (45%)         | 11 (55%)      |
| Center 2                                        | 974 (56%)          | 14 (61%)      | 297 (67%)         | 13 (65%)      |
| <b>ICU diagnosis</b>                            |                    |               |                   |               |
| Cardiac surgery                                 | 159 (9%)           | 4 (17%)       | 164 (37%)         | 3 (15%)       |
| Cardiac (non-surgical)                          | 99 (6%)            | 1 (4%)        | 24 (5%)           | 3 (15%)       |
| Trauma                                          | 179 (10%)          | 1 (4%)        | 34 (8%)           | 0             |
| Infection (non-bronchiolitis)                   | 294 (17%)          | 4 (17%)       | 68 (15%)          | 4 (20%)       |
| Neurologic/neurosurgical                        | 239 (14%)          | 4 (17%)       | 38 (9%)           | 0             |
| Gastrointestinal <sup>a</sup>                   | 44 (3%)            | 2 (9%)        | 17 (4%)           | 5 (25%)**     |
| Oncologic                                       | 42 (2%)            | 1 (4%)        | 5 (1%)            | 2 (10%)*      |
| Respiratory                                     | 186 (11%)          | 0             | 26 (6%)           | 2 (10%)       |
| Diabetes                                        | 38 (2%)            | 1 (4%)        | 16 (4%)           | 0             |
| Other <sup>b</sup>                              | 468 (27%)          | 5 (22%)       | 52 (12%)          | 1 (5%)        |
| Postoperative (non-cardiac)                     | 574 (33%)          | 6 (26%)       | 80 (18%)          | 3 (15%)       |
| PRISM death rate                                | 1.9 (3.7)          | 1.4 (2.3)     | 4.9 (13.8)        | 4.3 (13.8)    |
| <b>Pediatric Medical Complexity Algorithm</b>   |                    |               |                   |               |
| No chronic disease                              | 332 (19%)          | 1 (4%)        | 51 (11%)          | 1 (5%)        |
| Non-complex chronic disease                     | 434 (25%)          | 2 (9%)        | 75 (17%)          | 0             |
| Complex chronic disease                         | 982 (56%)          | 20 (87%)*     | 318 (72%)         | 19 (95%)      |
| <b>ICU Characteristics and Outcomes</b>         |                    |               |                   |               |
| Nephrotoxic antibiotics in the ICU <sup>c</sup> | 295 (17%)          | 9 (39%)*      | 144 (32%)         | 12 (60%)*     |
| NSAIDs                                          | 175 (10%)          | 3 (13%)       | 88 (20%)          | 2 (10%)       |
| Vasopressors used (yes/no)                      | 174 (10%)          | 4 (17%)       | 208 (47%)         | 7 (35%)       |
| Steroids used (yes/no)                          | 437 (25%)          | 7 (30%)       | 133 (30%)         | 9 (45%)       |
| Mechanically ventilated (yes/no)                | 690 (40%)          | 7 (30%)       | 317 (71%)         | 10 (50%)*     |
| Length of mechanical ventilation, days          | 0 (2)              | 0 (1)         | 2 (6)             | 1 (3.5)       |
| ICU length of stay, days                        | 1.1 (1.9)          | 1.5 (3.2)     | 3.7 (6.9)         | 3.9 (9.3)     |
| Hospital length of stay                         | 7 (9)              | 13 (22)*      | 13 (17)           | 42 (60)**     |
| <b>Kidney related</b>                           |                    |               |                   |               |
| Baseline eGFR                                   | 120 (36)           | 120 (64)      | 120 (49)          | 120 (45.3)    |
| Renal replacement therapy in ICU                | 0                  | 0             | 3 (0.7%)          | 1 (5%)        |

\*p&lt;0.05, \*\*p&lt;0.001

Comparisons made between patients with and without a CKD diagnosis 5-years post-discharge in the non-AKI and AKI population separately. Continuous variable presented as median (IQR) and categorical variables presented as number (percentage). Associations between continuous variables determined using Students t-test or Kruskal-Wallis test depending on the distribution. Categorical variables were evaluated using Chi<sup>2</sup> test or Fisher's exact test.

<sup>a</sup>Gastrointestinal includes liver, stomach, pancreas, intestine.

**Supplemental Table 5:** Baseline and ICU characteristics of patients with no serum creatinine or urine output measured during ICU admission (i.e. no AKI status defined) compared to patients with no AKI

|                                               | <b>No serum creatinine or urine output measured (N= 402)</b> | <b>Non-AKI (N= 1206)</b> |
|-----------------------------------------------|--------------------------------------------------------------|--------------------------|
| <b>Baseline Patient Characteristics</b>       |                                                              |                          |
| ICU admission age, years                      | 5.6 ± 5.4 (3.1)                                              | 6.4 ± 5.8 (4.7)          |
| Female Gender                                 | 159 (40%)                                                    | 549 (46%)                |
| Hospital Saint-Justine                        | 145 (36%)                                                    | 765 (63%)                |
| PRISM death rate                              | 2.5 ± 4.4 (1.4)                                              | 4.3 ± 7.7 (1.9)          |
| Baseline GFR                                  | 105 ± 25 (120)                                               | 99 ± 28 (112)            |
| <b>ICU Characteristics and Outcomes</b>       |                                                              |                          |
| Nephrotoxic antibiotics (yes/no) <sup>a</sup> | 26 (7%)                                                      | 262 (22%)                |
| Vasopressors used (yes/no)                    | 2 (0.5%)                                                     | 74 (6%)                  |
| Steroids used (yes/no)                        | 107 (27%)                                                    | 323 (27%)                |
| Mechanically ventilated (yes/no)              | 63 (16%)                                                     | 489 (41%)                |
| ICU length of stay, days                      | 1.1 ± 1.3 (0.8)                                              | 3.1 ± 5.7 (1.3)          |
| Hospital length of stay                       | 8.9 ± 55.1 (4)                                               | 17.6 ± 53.2 (9)          |
| <b>Post-discharge characteristics</b>         |                                                              |                          |
| 5-7 year mortality                            | 11 (3%)                                                      | 62 (5%)                  |

\* P < 0.05; \*\* P < 0.001

Continuous variables expressed as mean ± standard deviation (median), categorical variables expressed as number (percentage).

<sup>a</sup>Includes aminoglycosides, acyclovir/ganciclovir, amphotericin, and vancomycin

Abbreviations: AKI=acute kidney injury; ICU = Intensive Care Unit; PRISM = Pediatric Risk of Mortality; GFR = Glomerular filtration rate

**Supplemental Table 6:** Sensitivity analysis results – multivariable analysis excluding patients without a serum creatinine or urine output measured in the pediatric intensive care unit

|                        | <b>Multivariable HR<br/>[95%CI]</b> |
|------------------------|-------------------------------------|
| No AKI (N = 1369)      | 1.00                                |
| AKI (N = 297)          | 2.6 [1.3 – 5.0]*                    |
| No AKI/Stage1 (N=1675) | 1.00                                |
| Stage 2 or 3 (N=158)   | 2.1 [1.0 – 4.6]                     |
| No AKI (N=1369)        | 1.00                                |
| Stage 1 (N=306)        | 2.4 [1.1 – 5.2]*                    |
| Stage 2/3 (N=158)      | 2.8 [1.2 – 6.5]*                    |

\* P<0.05

Abbreviations: *AKI* = acute kidney injury; *HR* = hazard ratio; *CI* = confidence interval

**Supplemental Figure 1:** Cumulative incidence graphs excluding patients with a CKD diagnosis made within 90-days post-hospital discharge

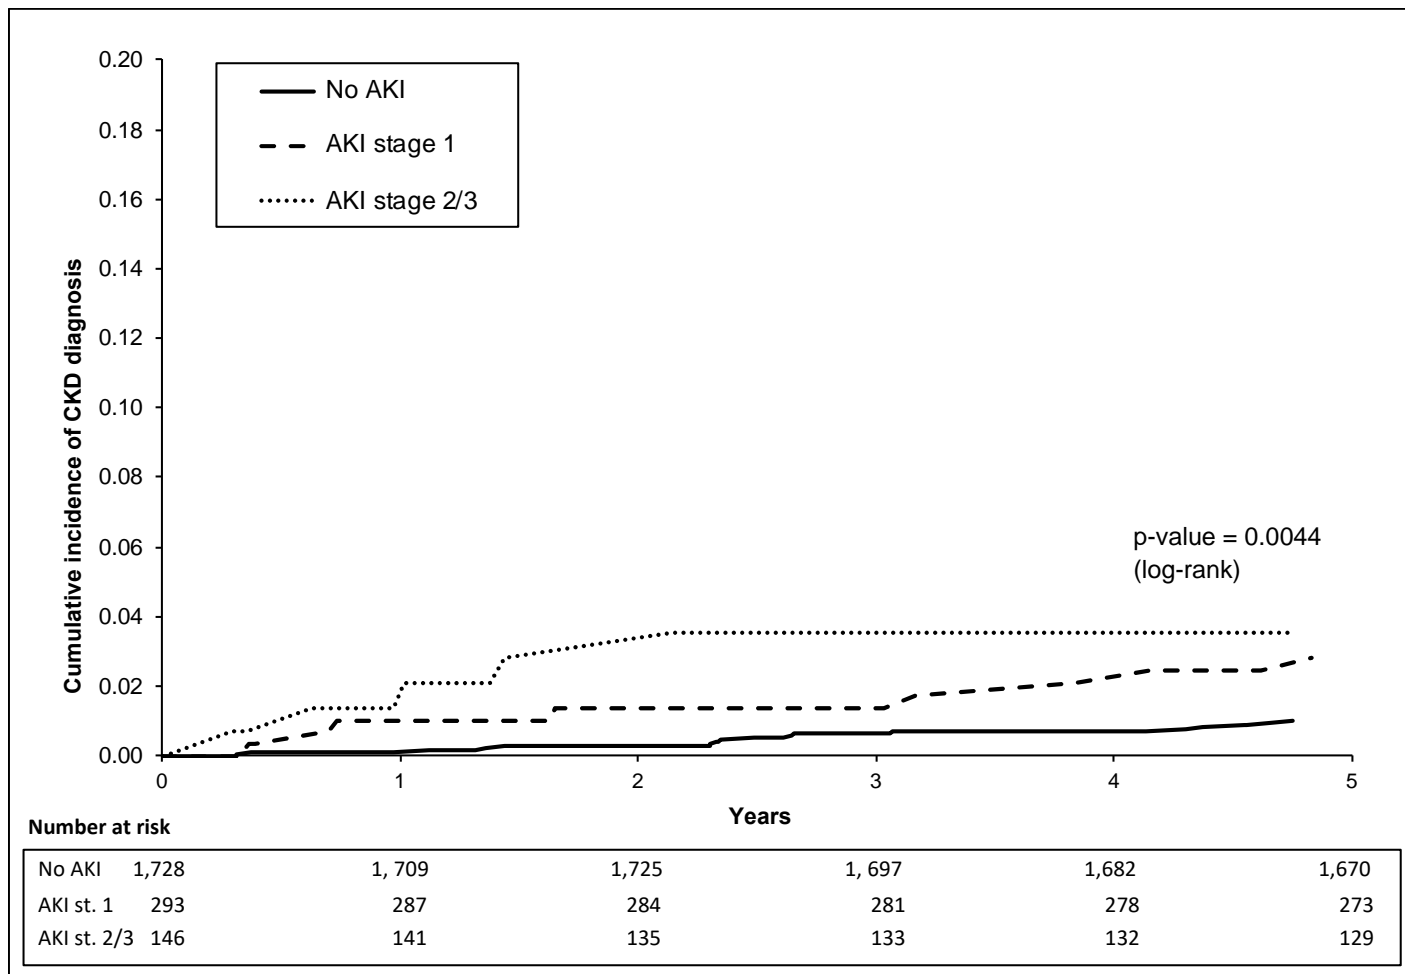

Compares incidence of a CKD diagnosis in patients with no AKI (solid line), stage 1 AKI (dashed line) and stage 2-3 AKI (dotted line). Time zero is 90-days after hospital discharge date. Log-rank test used to compare groups.

Abbreviations: *CKD* = chronic kidney disease; *AKI* = acute kidney injury
